# Supplementary material
Source: Springer Nature journal article supplement (https://www.springermedizin.de/resource/supplementary/12939_2012_296_MOESM2_ESM.pdf/9550818)
Supplement: MOESM2 [file 9550818]

**Table 2: Indicators of Health Care Access in the Postpartum Period**

|                                                                                             |                                                                                        |
|---------------------------------------------------------------------------------------------|----------------------------------------------------------------------------------------|
| Median Hospital stay post-birth                                                             | Total sample: 2.4 days<br>Vaginal birth: 1.9 days                                      |
| Percentage of participants who reported not being able to access desired care. <sup>i</sup> | Below Median Income:<br>39.5%<br><br>Above Median Income:<br>27.3%<br><br>Total: 33.8% |

---

<sup>i</sup> This dichotomous question was phrased: “ Would you have wanted these types of care but they were not available to you” and followed a series of questions where respondents reported on postpartum care from obstetricians, family physicians, midwives, nurses, doulas, alternative health care practitioners and other types of care providers.
